# Supplementary material
Source: PubMed Central journal article supplement (PMC5113821)
Supplement: NIHMS819148-supplement-1.pdf [file NIHMS819148-supplement-1.pdf]

# Supplemental Figure 1

A

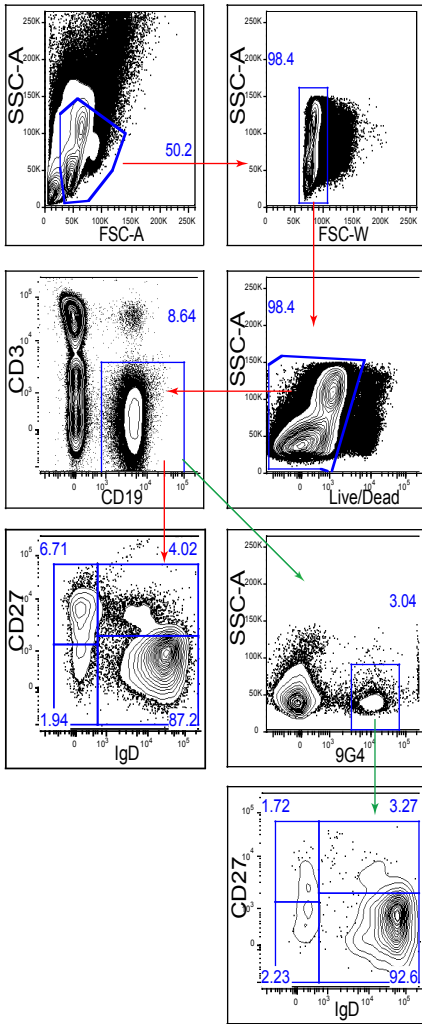

B

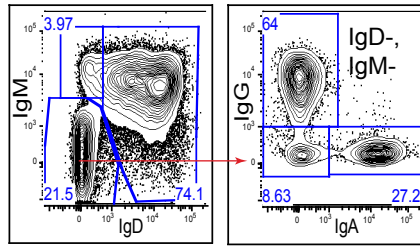

D

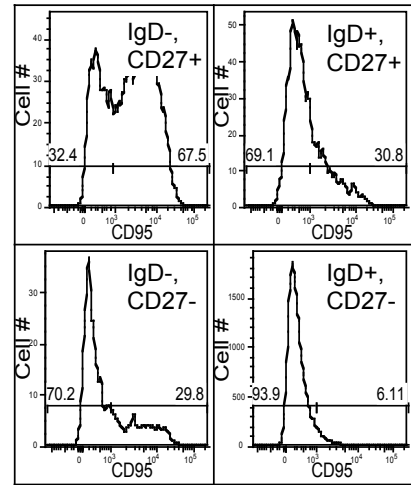

C

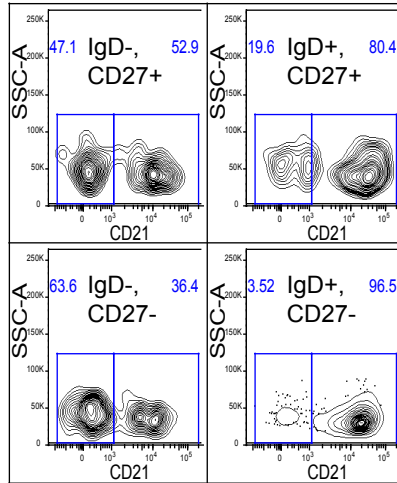

Supplemental Figure 1. Gating strategy for assessing bulk and 9G4+ B cell subsets. Antibodies for the analysis are listed in supplemental table 1. A. Lymphocytes were first gated on by forward side scatter – area and side scatter – area. Next doublet cells were excluded by using the side scatter width ‘low’ gated population. Living cells were then gated as low for the live/dead dye. Next CD3 and CD19 antibodies were used to gate on bulk B cells as CD3-, CD19+. Bulk B cells were separated into naïve and memory B cell subsets by using IgD and CD27. Separately, the bulk B cells were gated on for 9G4+ity, and then the 9G4+ cells were separated by IgD and CD27 as well. B. Both bulk and 9G4+ B cells were further gated as IgD+, IgM, IgD-, or switched (IgD-, IgM-). The switched population was then further separated by IgG and IgA to decipher IgG+ (IgA-), IgA+ (IgG-), or ‘other’ unlabeled cells. C. Both bulk B cells or 9G4+ B cells were further gated on for being positive or negative for CD21 for the IgD, CD27 naïve/memory B cell subsets. D. Both bulk and 9G4+ B cells were assessed for CD95 by gating on IgD and CD27 memory subsets and using a histogram positive gate for CD95.

## Supplemental Table 1.

### Adult Panel

| Marker       | Color    | Company             | Catalog #   |
|--------------|----------|---------------------|-------------|
| CD19         | BV421    | BioLegend           | 302234      |
| Live/Dead    | Aqua     | Invitrogen          | L34957      |
| IgM          | BV570    | Biolegend           | 314517      |
| CD3          | BV605    | Biolegend           | 317321      |
| CD27         | BV650    | BioLegend           | 302827      |
| IgG          | Fitc     | BD                  | 560952      |
| CD95         | PE-CF594 | BD                  | 562395      |
| CD21         | PE-Cy5.5 | BD                  | 551064      |
| IgD          | PE-Cy7   | Biolegend           | 348210      |
| IgA          | APC      | MiltenyBiotec       | 130-093-113 |
| 9G4          | Biotin   | (From Ignacio Sanz) |             |
| Streptavidin | AF680    | Invitrogen          | S-32358     |

### 6 year old panel

| Marker       | Color    | Company             | Catalog # |
|--------------|----------|---------------------|-----------|
| CD19         | BV421    | BioLegend           | 302234    |
| Live/Dead    | Aqua     | Invitrogen          | L34957    |
| CD3          | BV605    | Biolegend           | 317321    |
| CD27         | PE       | Biolegend           | 356406    |
| IgD          | PE-Cy5.5 | Biolegend           | 348208    |
| 9G4          | Biotin   | (From Ignacio Sanz) |           |
| Streptavidin | AF680    | Invitrogen          | S-32358   |

Biolegend: San Diego, CA  
Beckman Dickinson (BD) Franklin Lakes, NJ  
Invitrogen Carlsbad, CA  
MiltenyiBiotec San Diego, CA

### Supplemental Table 1. Antibody panels used in cellular flow cytometric analysis.

Two B cell flow panels with markers, fluorochrome colors, companies, catalog numbers, and company locations listed.
